# Supplementary figures and images for: Synthesis and hetero-Diels–Alder reactions of enantiomerically pure dihydro-1H-azepines
Source: Royal Society of Chemistry journal article supplement (doi:10.1039/d0cc04413j), 2020-01-01

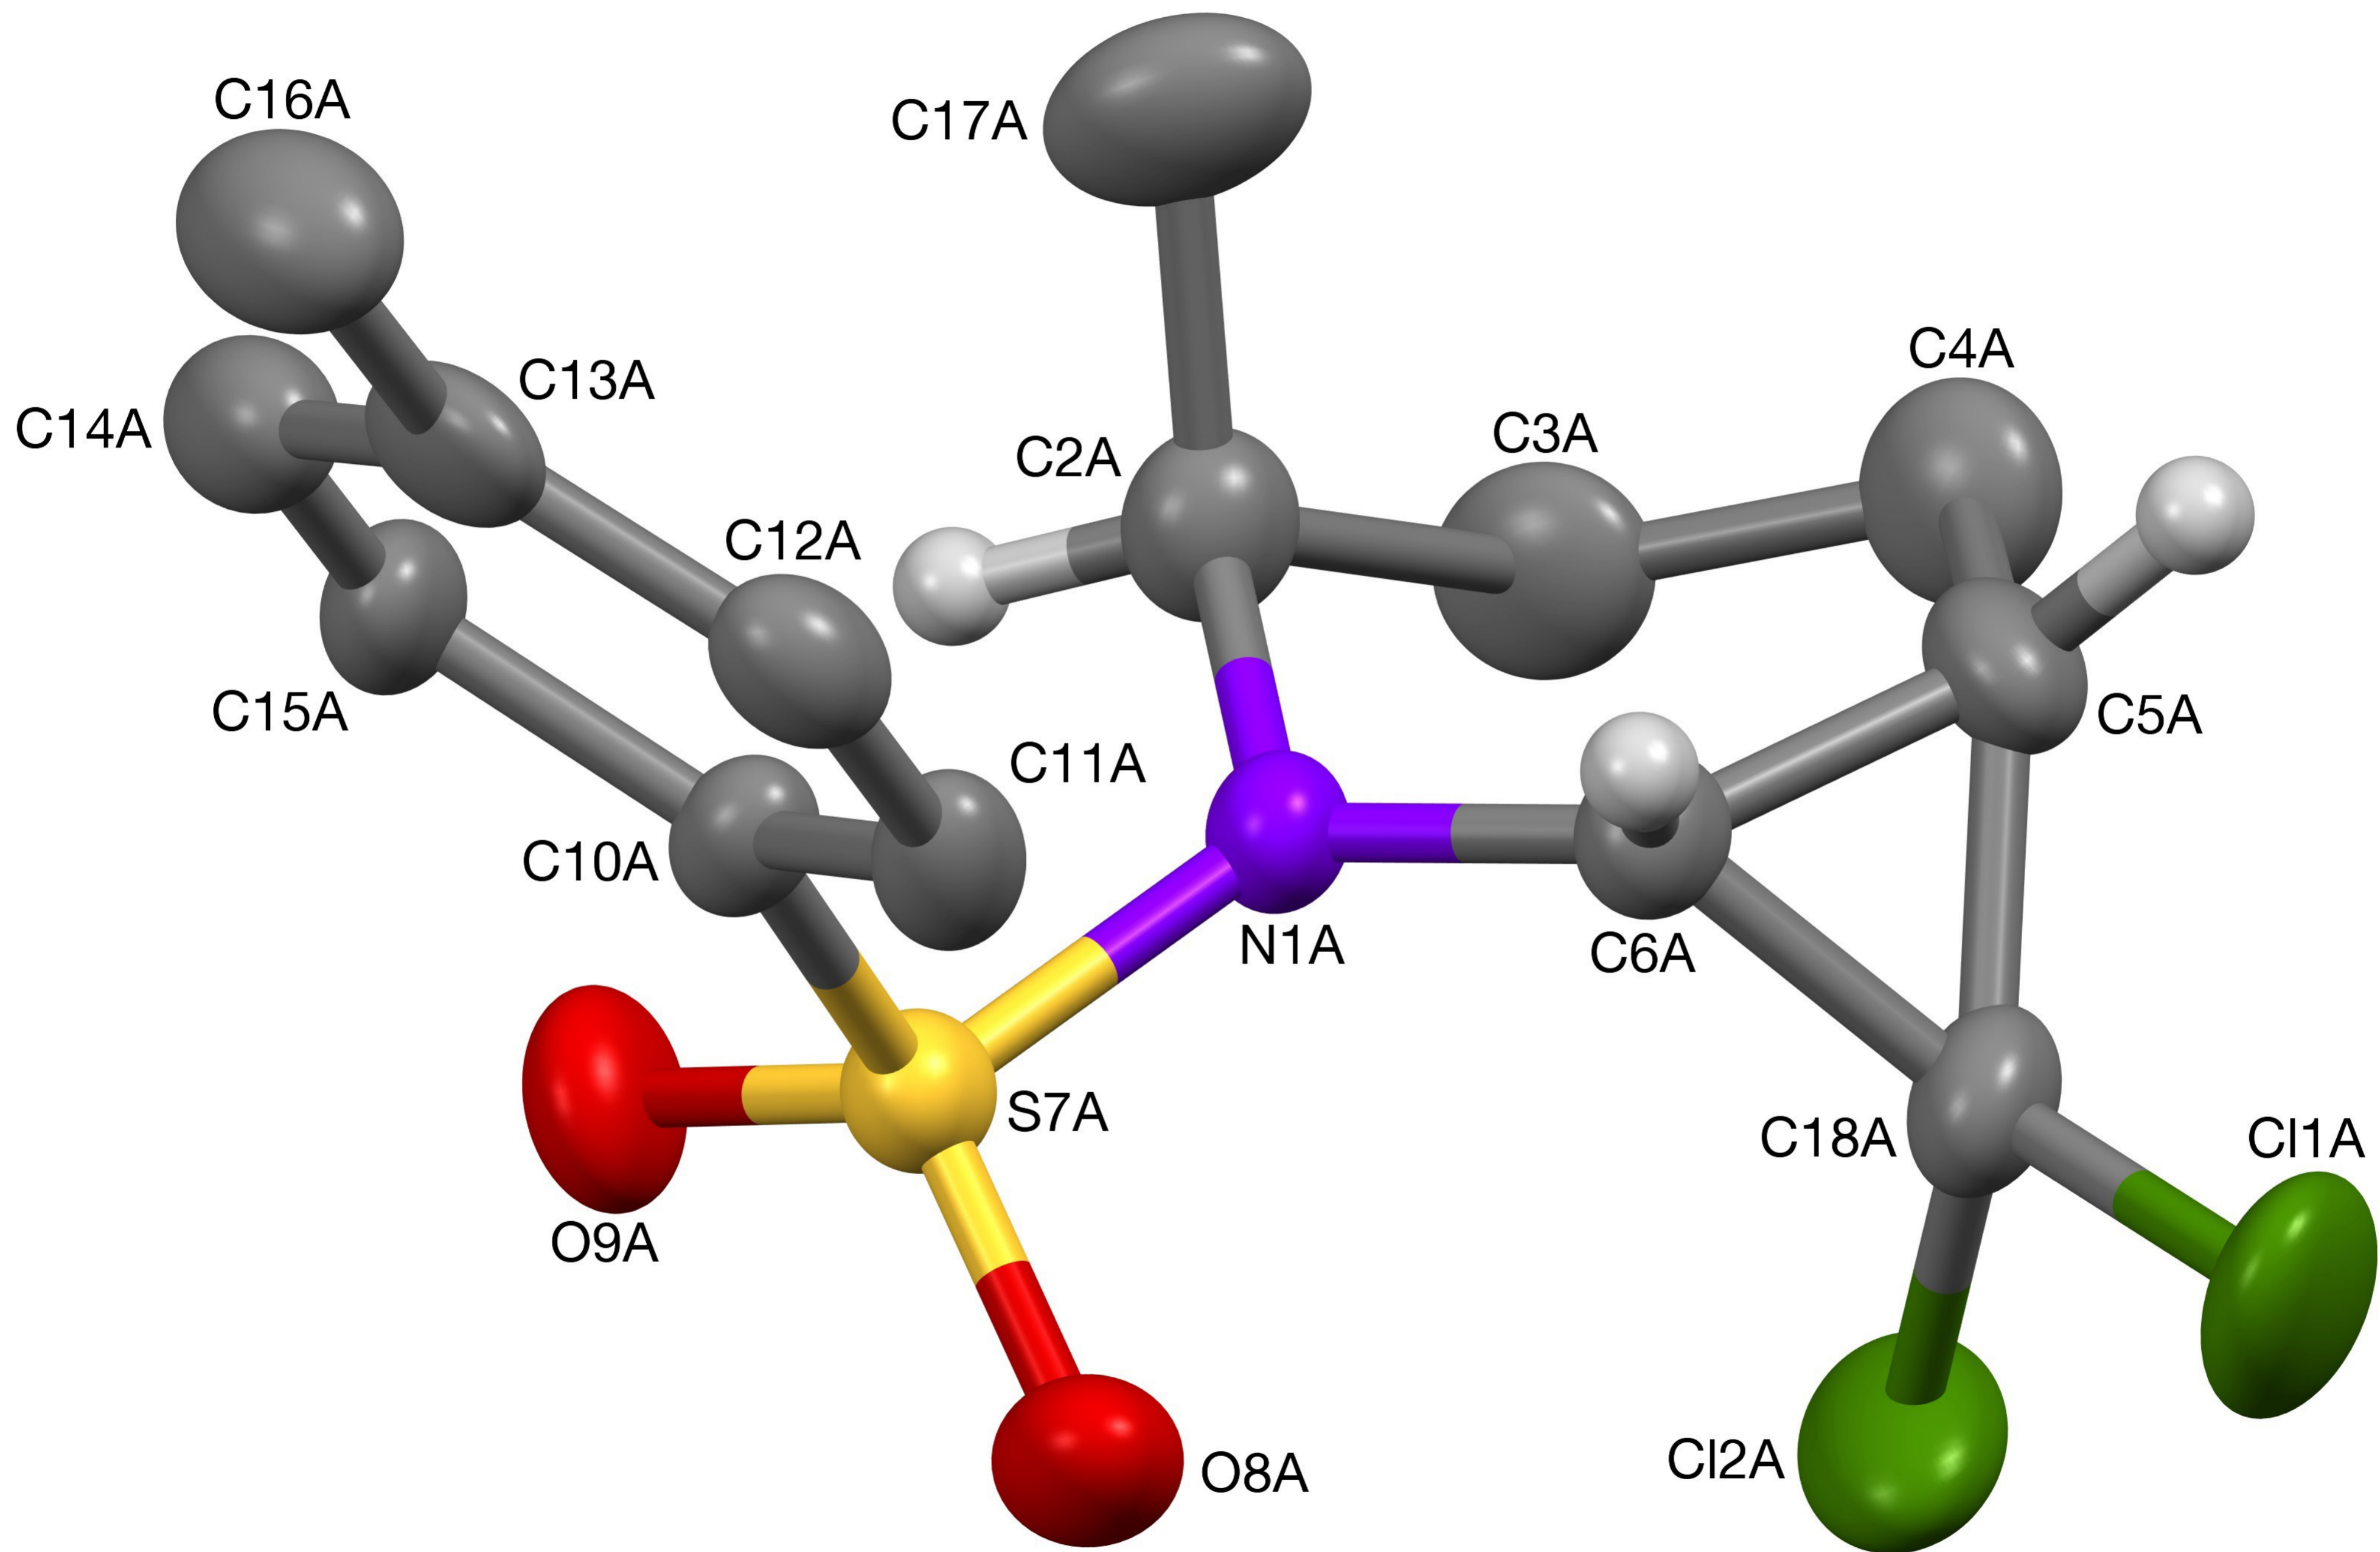

Supplement: d0cc04413j1.pdf [file d0cc04413j1.pdf]

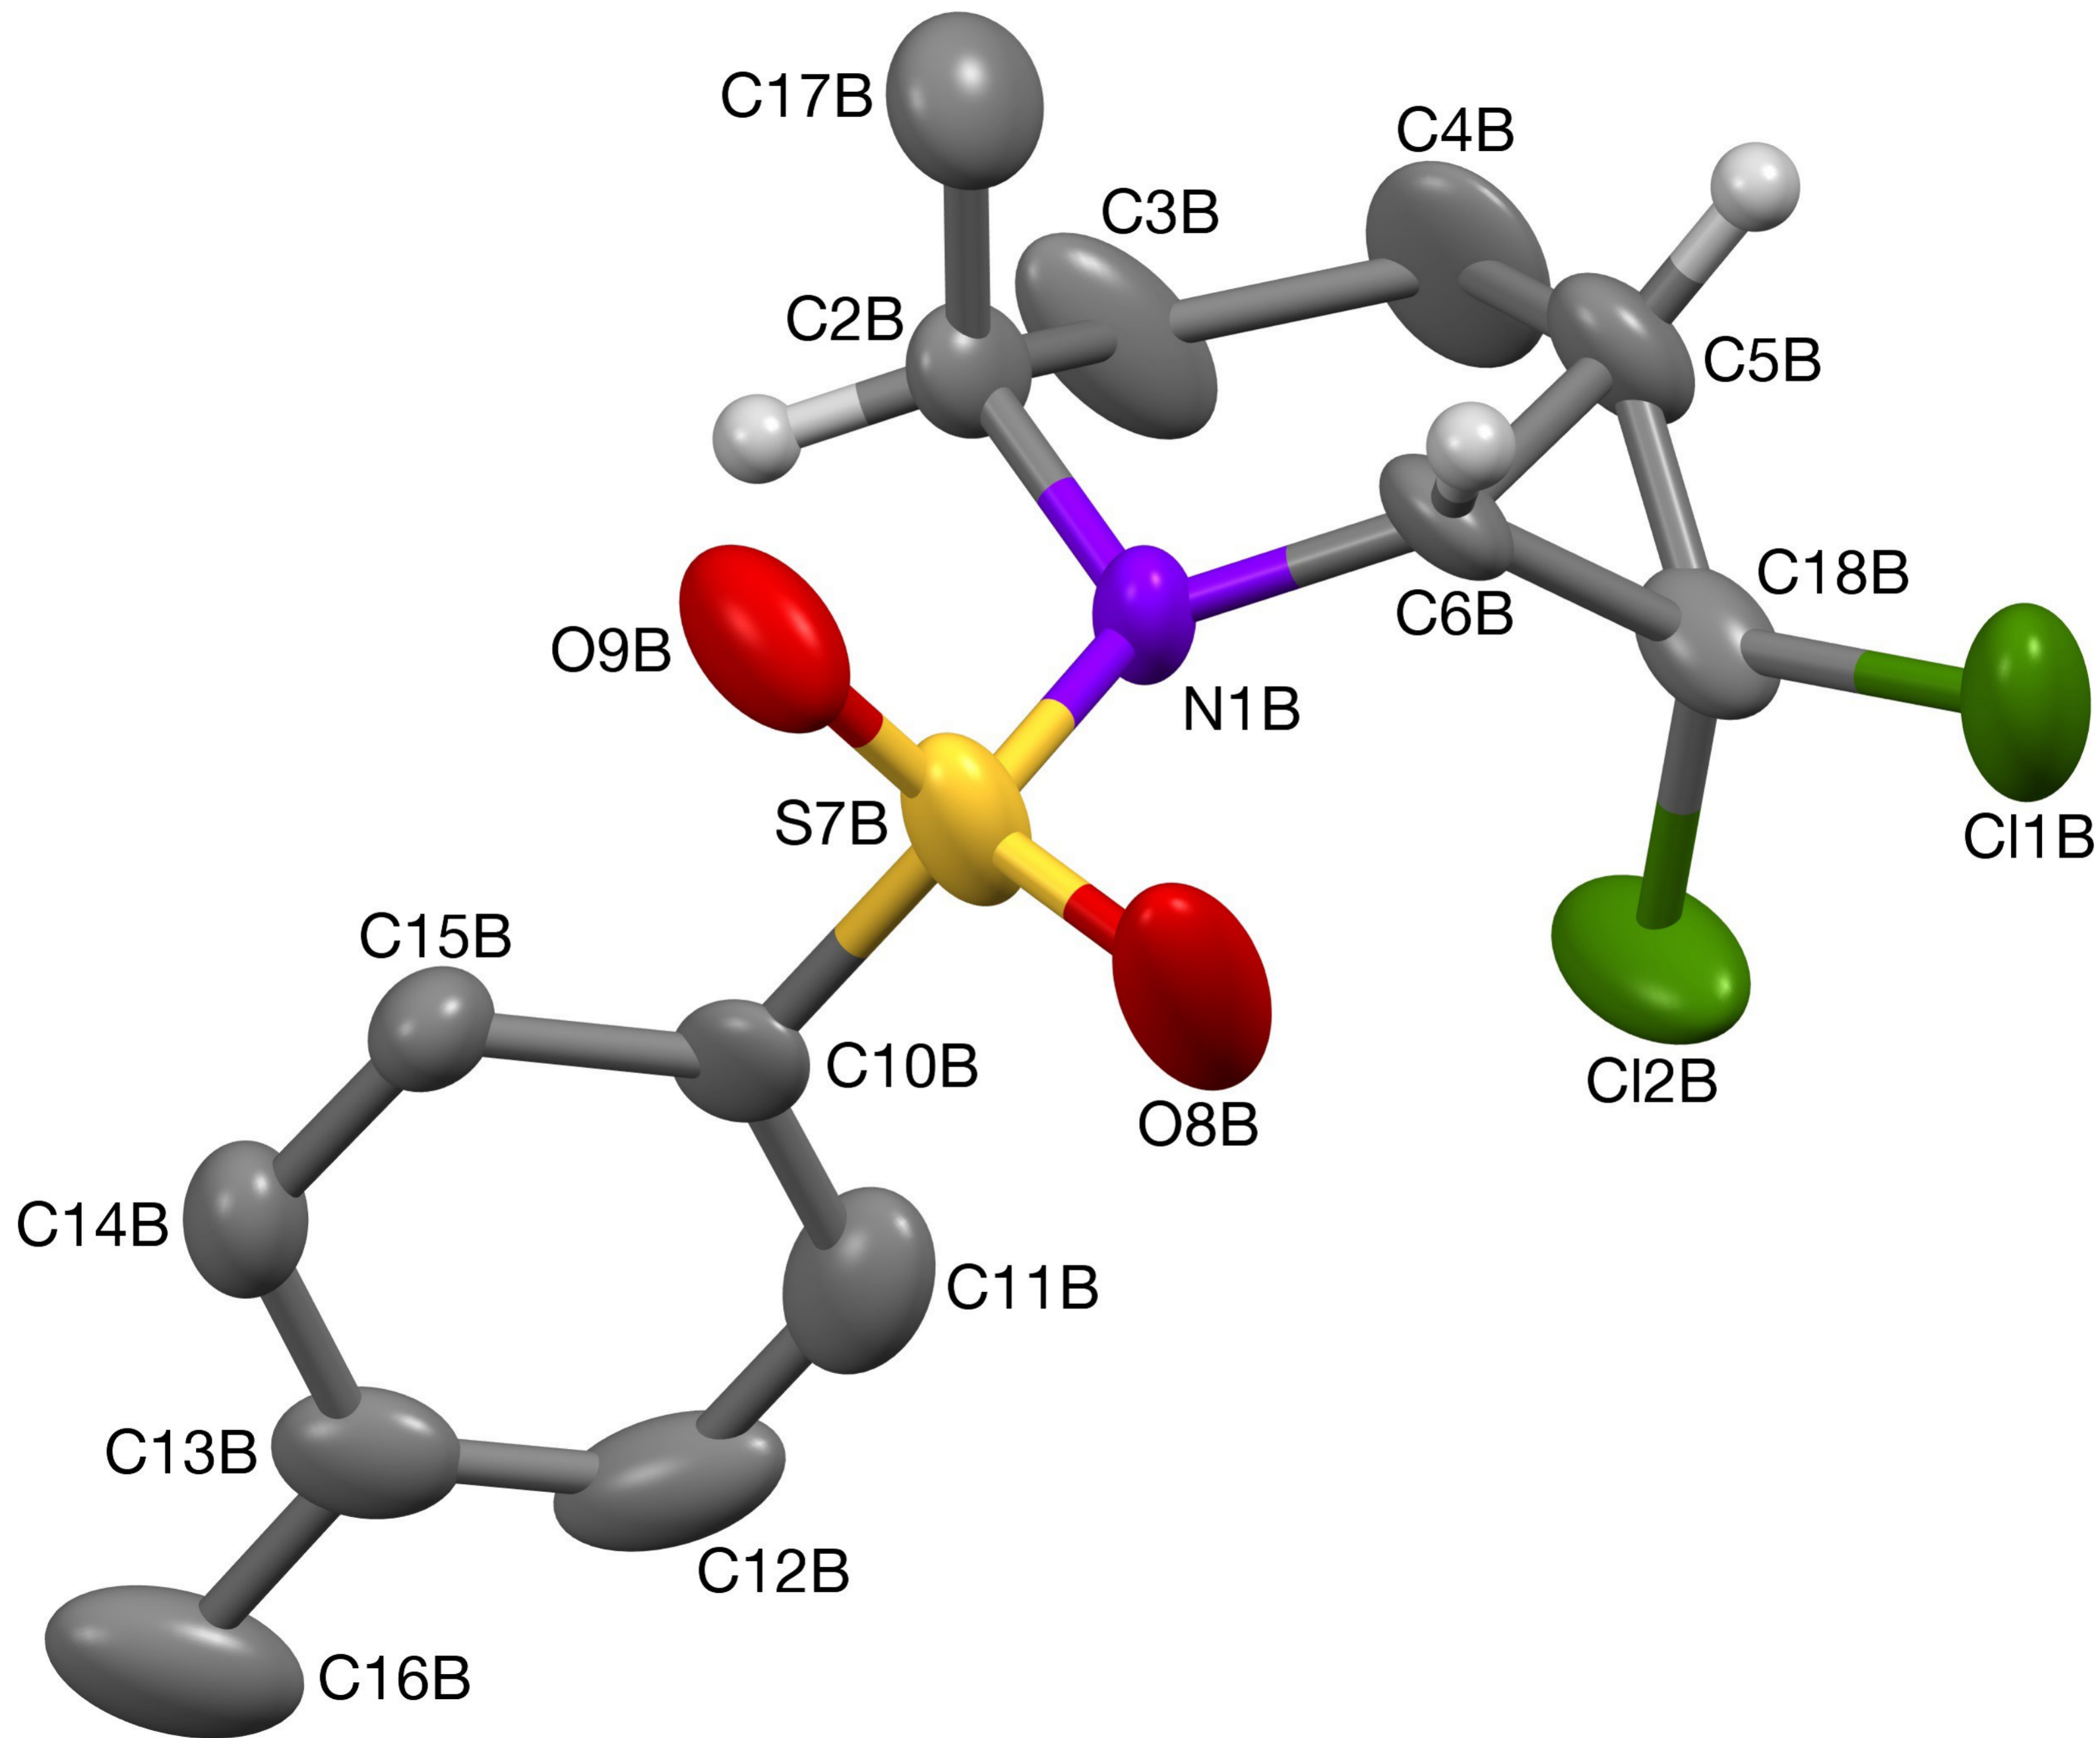

Supplement: d0cc04413j2.pdf [file d0cc04413j2.pdf]

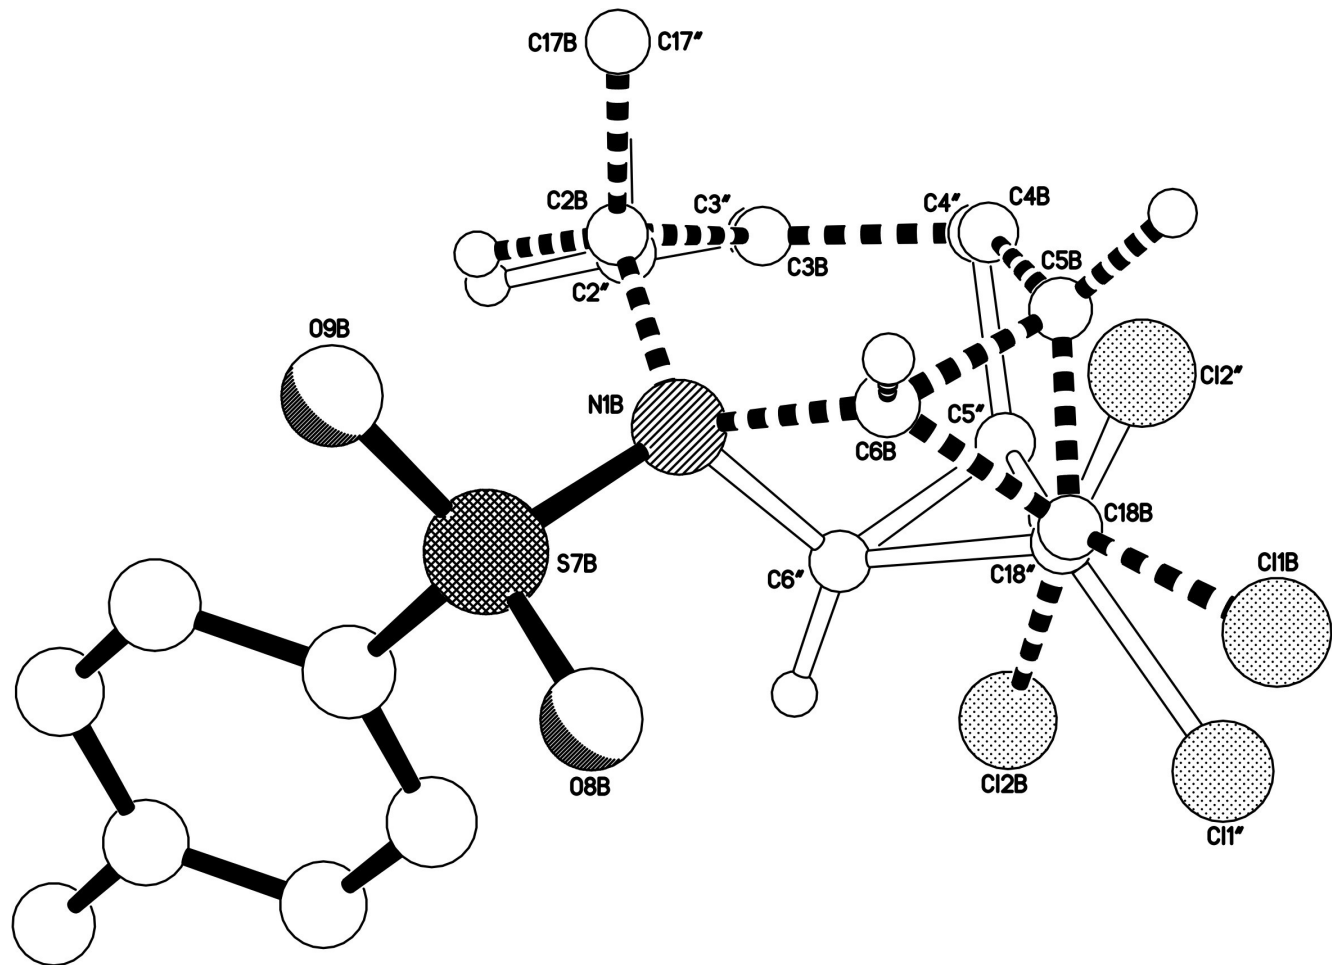

Supplement: d0cc04413j4.pdf [file d0cc04413j4.pdf]

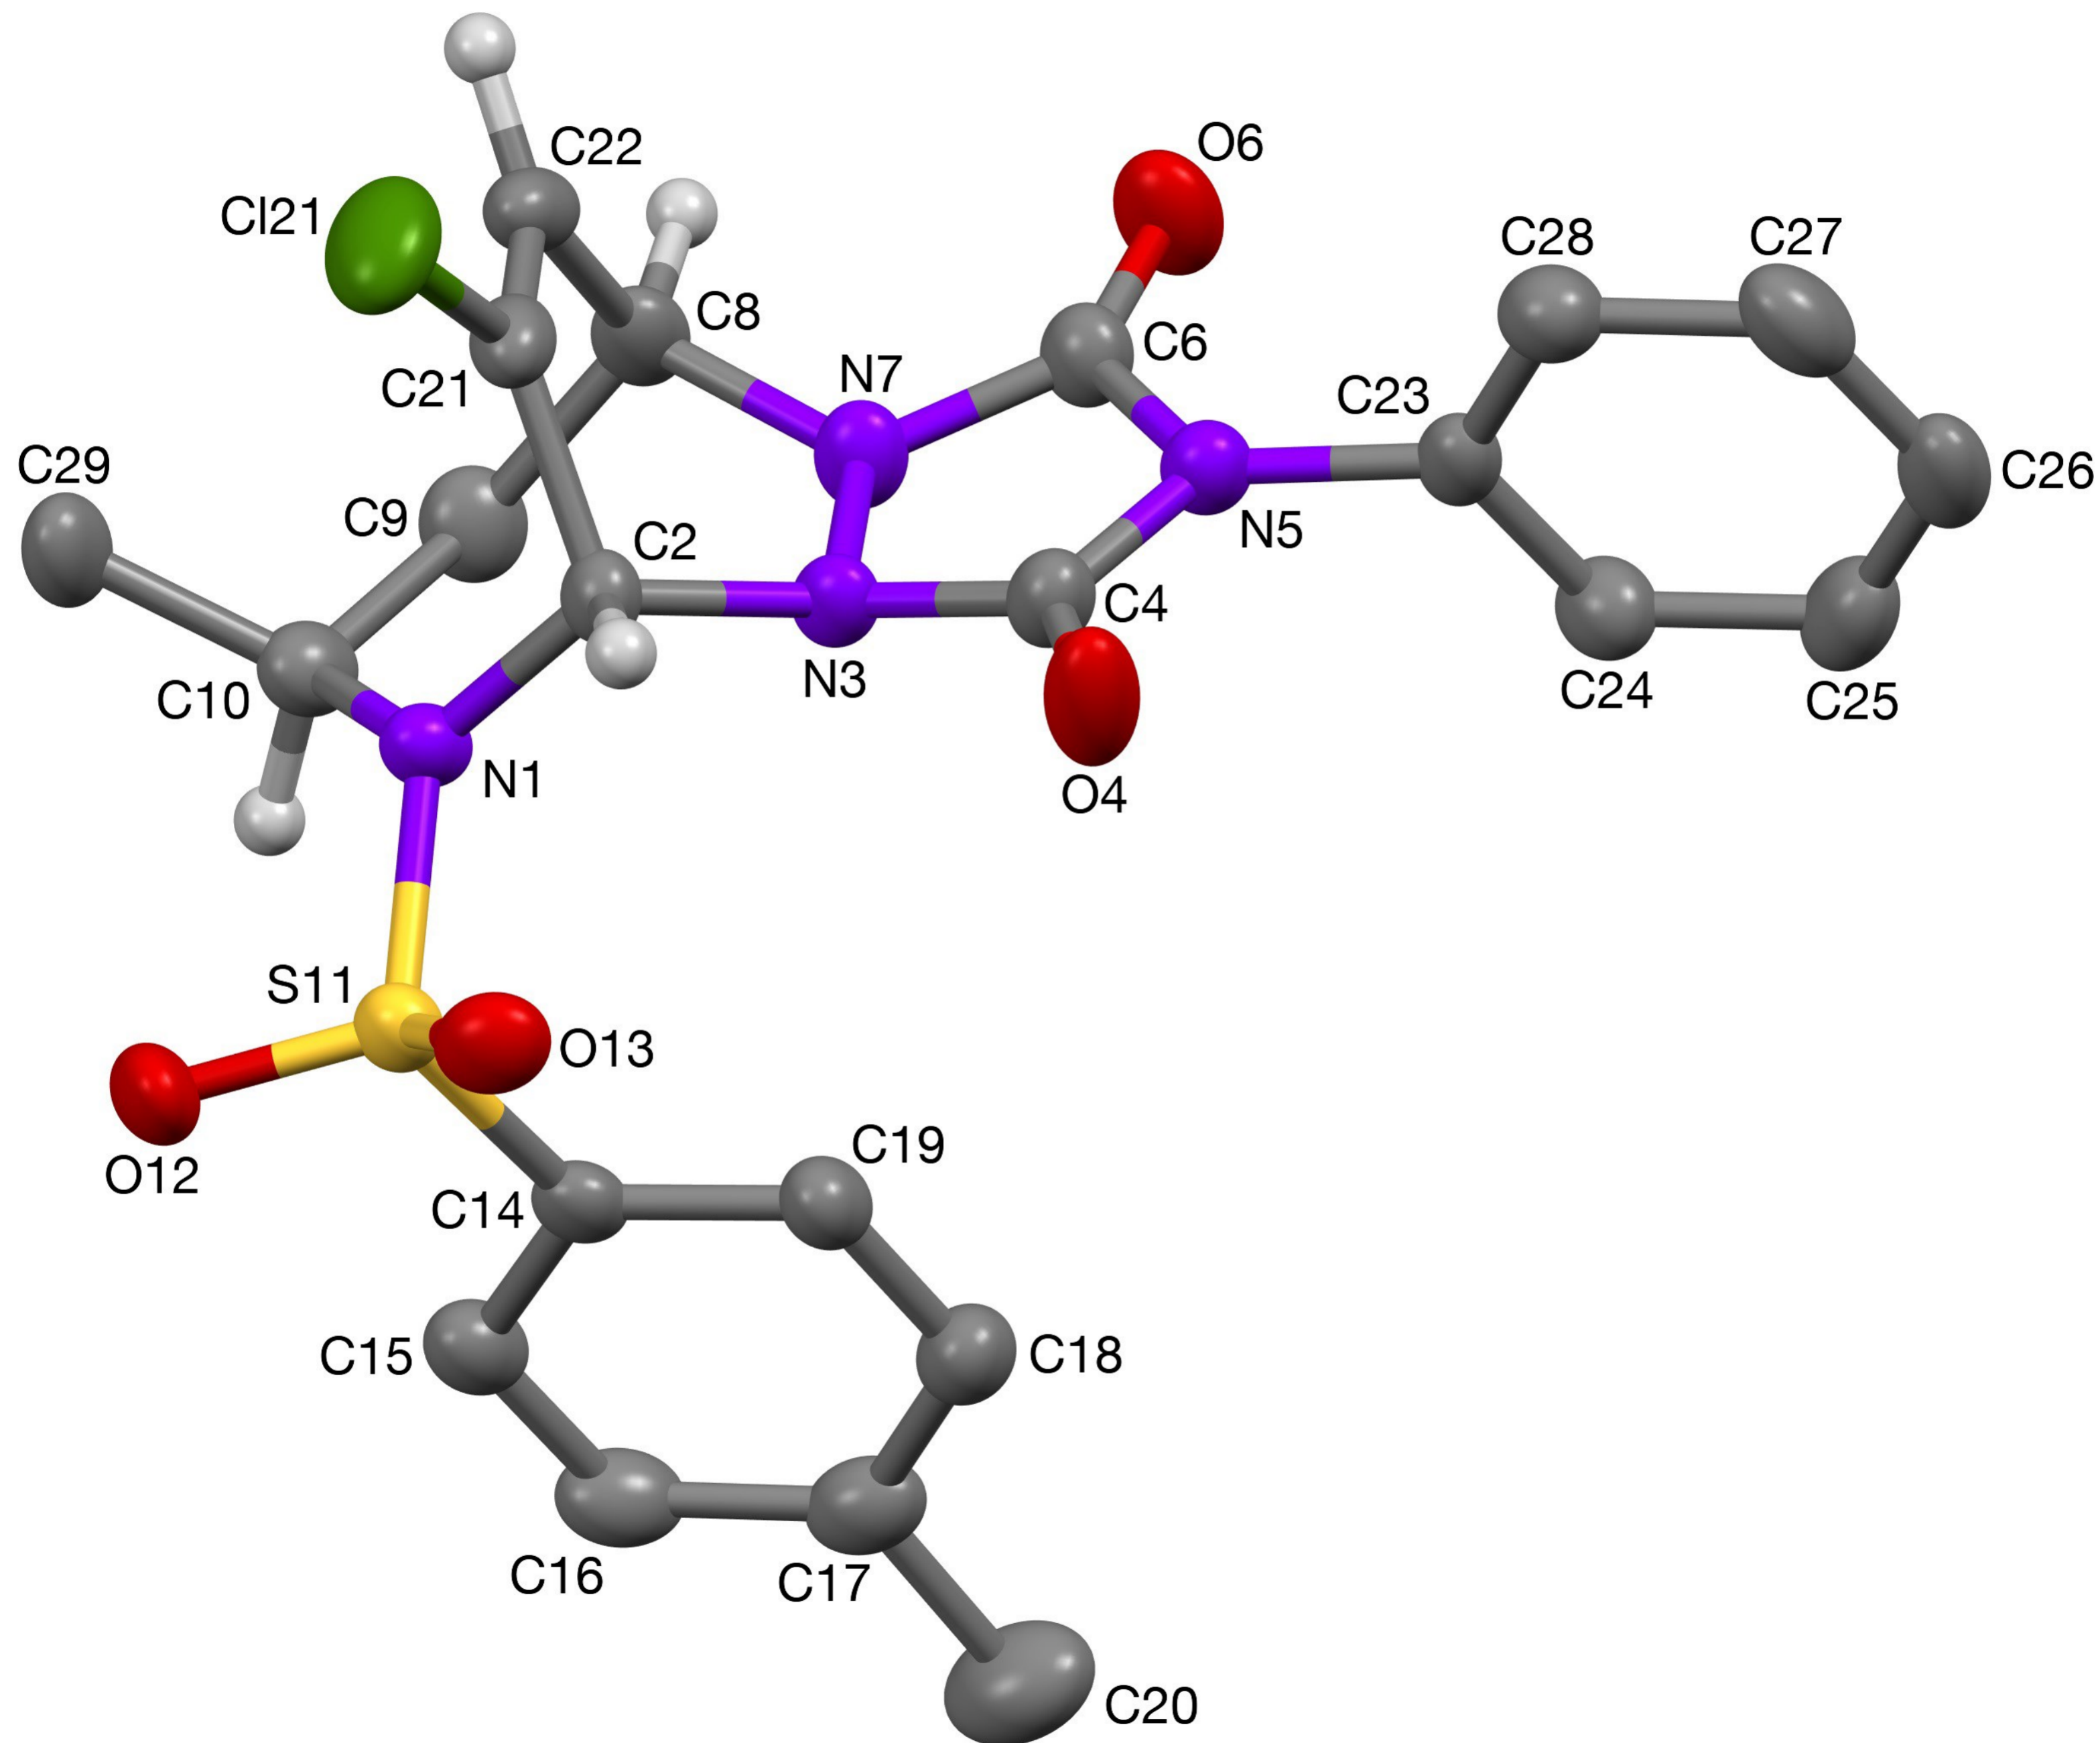

Supplement: d0cc04413j5.pdf [file d0cc04413j5.pdf]

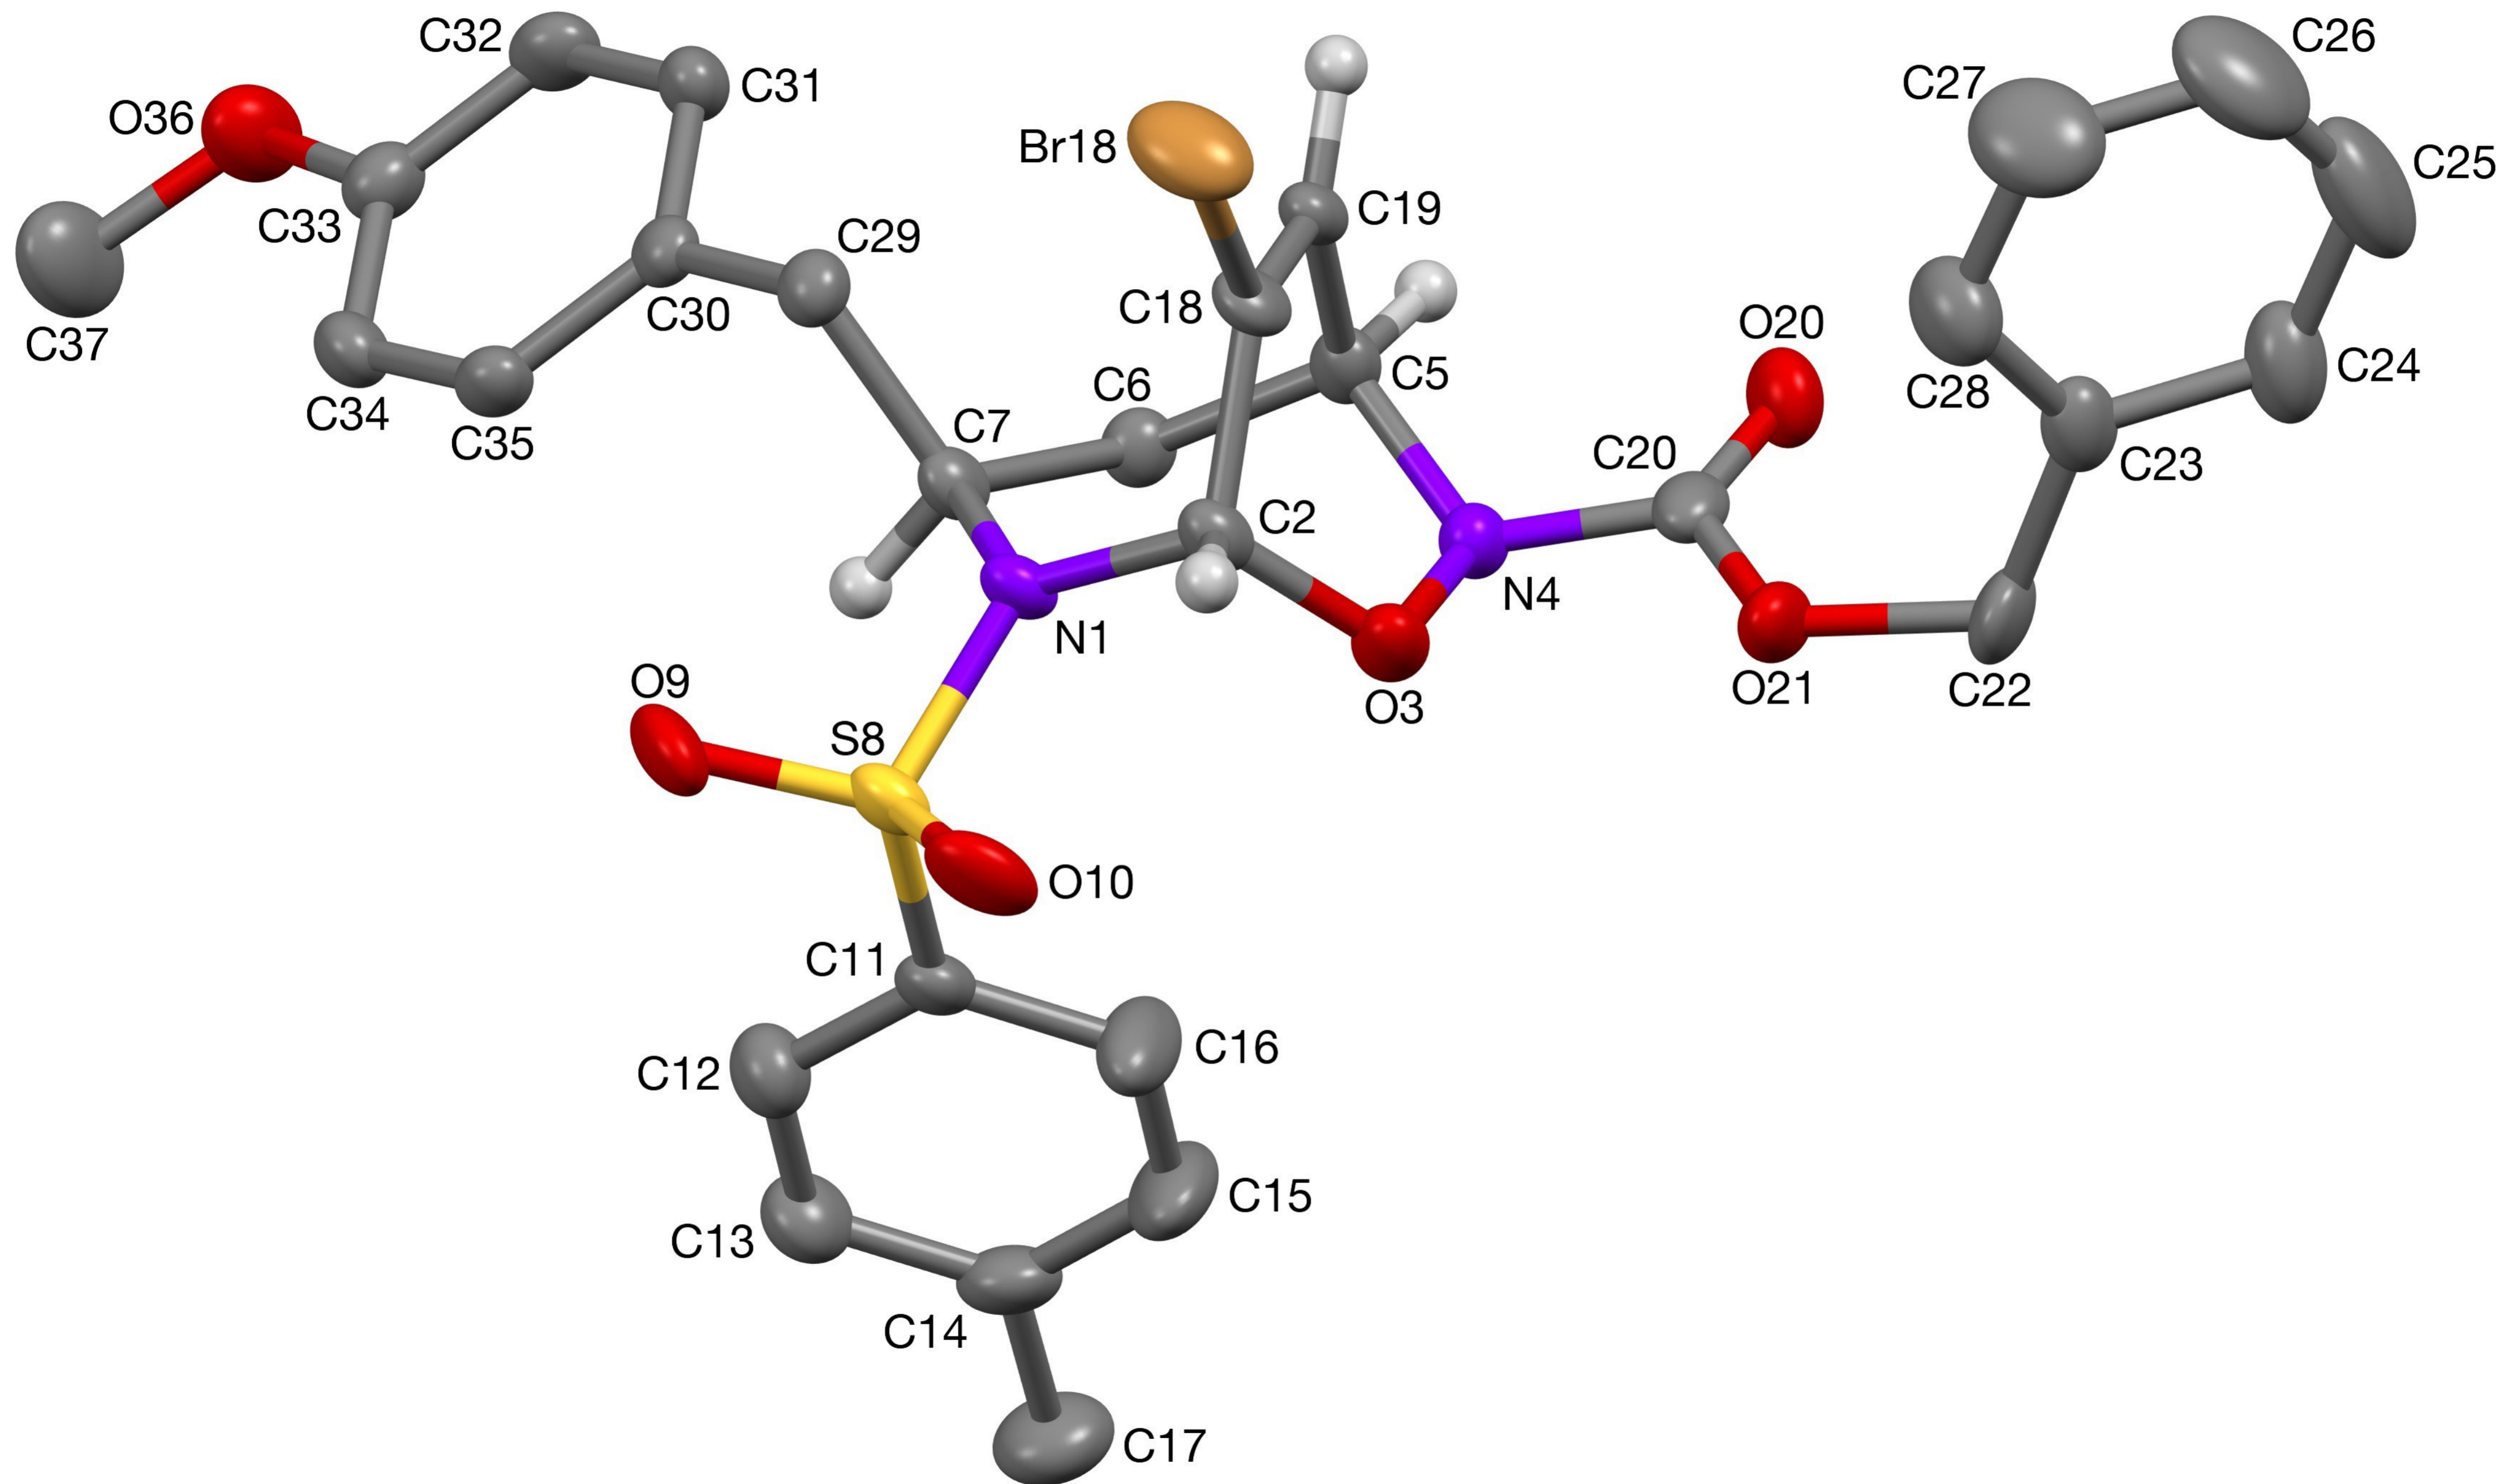

Supplement: d0cc04413j6.pdf [file d0cc04413j6.pdf]

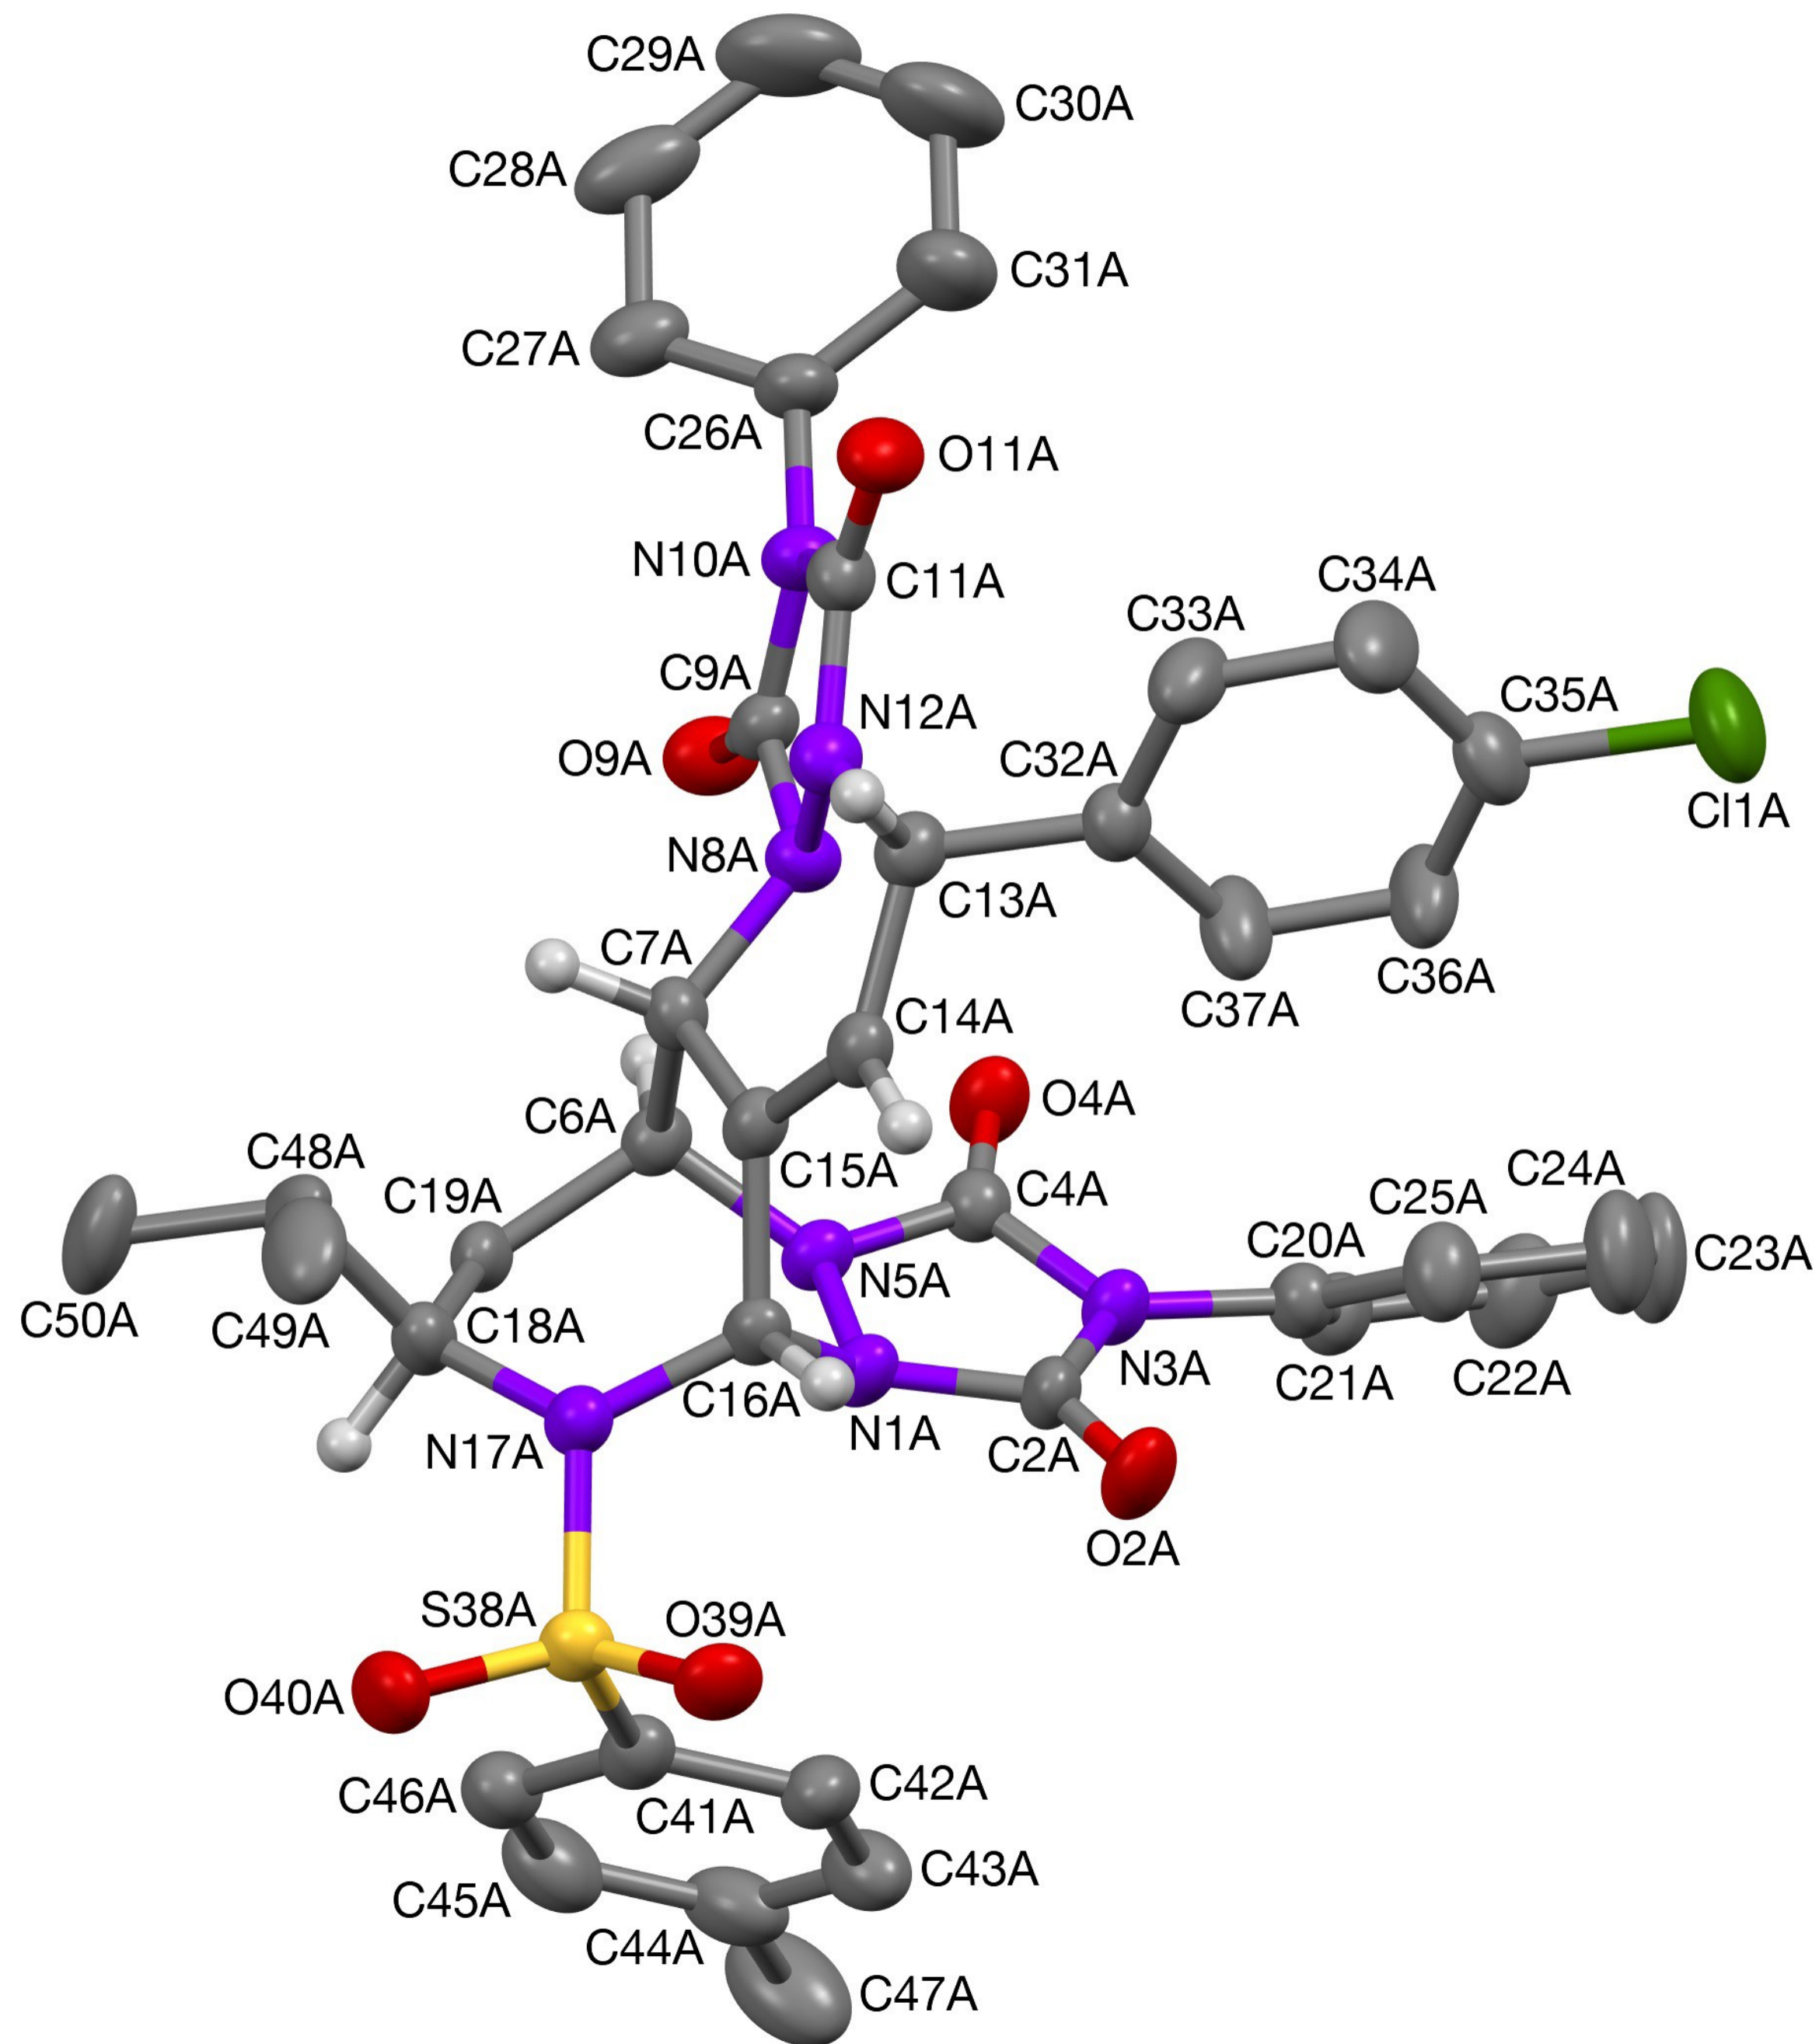

Supplement: d0cc04413j7.pdf [file d0cc04413j7.pdf]

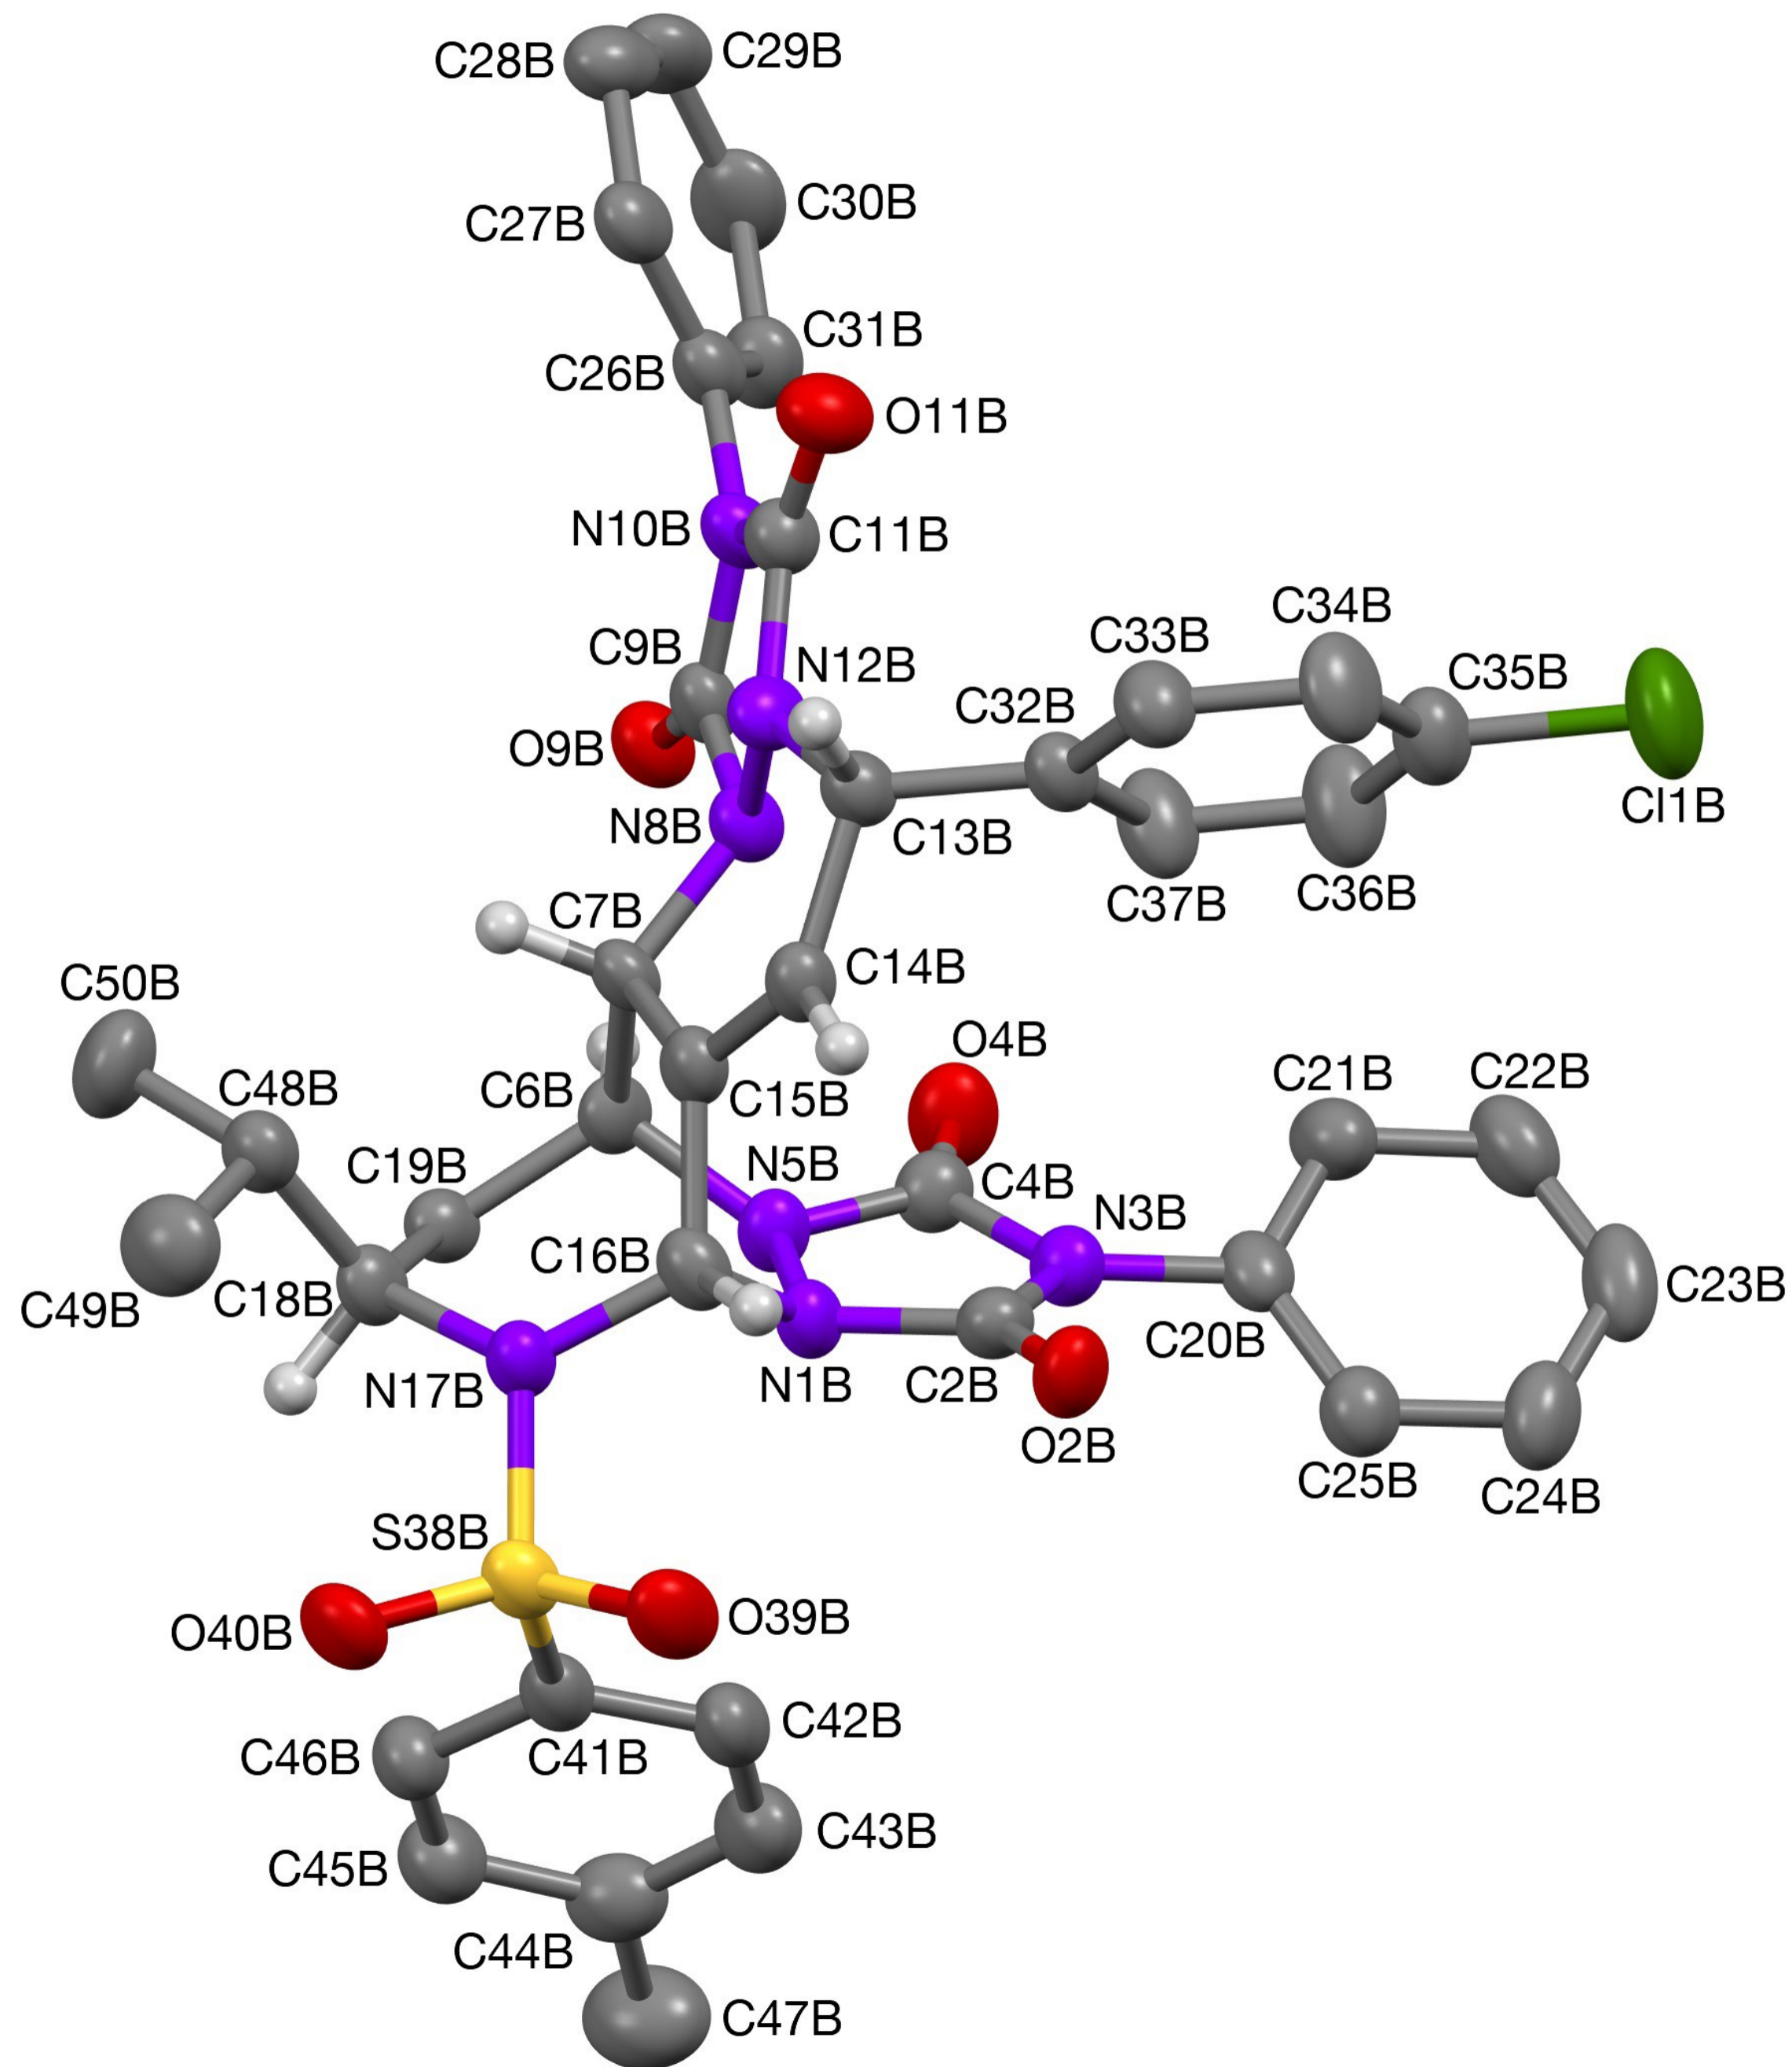

Supplement: d0cc04413j8.pdf [file d0cc04413j8.pdf]
